# Supplementary material for: Loss of ATF4 leads to functional aging-like attrition of adult hematopoietic stem cells
Source: PubMed Central journal article supplement — Sci Adv. 2021 Dec 22;7(52):eabj6877. doi: 10.1126/sciadv.abj6877 (PMC8694622; doi:10.1126/sciadv.abj6877), 2021-12-22
Supplement: sciadv.abj6877_sm.pdf [file sciadv.abj6877_sm.pdf]

Supplementary Materials for  
**Loss of ATF4 leads to functional aging-like attrition of adult hematopoietic stem cells**

Yan Sun\*, Xiaolin Lin, Bangdong Liu, Yaxuan Zhang, Wei Li, Sheng Zhang, Falian He, Han Tian, Xun Zhu, Ximeng Liu, Jueheng Wu, Junchao Cai\*, Mengfeng Li\*

\*Corresponding author. Email: limf@mail.sysu.edu.cn (M.L.); suny69@mail.sysu.edu.cn (Y.S.); caijch3@mail.sysu.edu.cn (J.C.)

Published 22 December 2021, *Sci. Adv.* 7, eabj6877 (2021)  
DOI: 10.1126/sciadv.abj6877

**This PDF file includes:**

Tables S1 to S4  
Figs. S1 to S6

## Supplementary Tables

**Table S1 Technical specifications of the antibodies (clones and sources)  
employed in flow cytometry analysis**

| Antigen/Specificity                             | Conjugation      | Host                | Clone        | Source      | Cat. No    |
|-------------------------------------------------|------------------|---------------------|--------------|-------------|------------|
| mouse CD16/32                                   | PE               | Rat                 | 93           | Biolegend   | 101307     |
| mouse CD127 (IL-7R $\alpha$ )                   | Biotin           | Rat                 | A7R34        | Biolegend   | 135005     |
| mouse CD48                                      | FITC             | Armenian<br>Hamster | HM48-1       | Biolegend   | 103403     |
| mouse/human CD11b                               | PE               | Rat                 | M1/70        | Biolegend   | 101208     |
| mouse CD3e                                      | APC              | Armenian<br>Hamster | 145-2C11     | Biolegend   | 100312     |
| mouse/human CD11b                               | APC              | Rat                 | M1/70        | Biolegend   | 101212     |
| mouse/human<br>CD45R/B220                       | APC              | Rat                 | RA3-6B2      | Biolegend   | 103212     |
| mouse Ly-6G/Ly-6C<br>(Gr-1)                     | APC              | Rat                 | RB6-8C5      | Biolegend   | 108412     |
| mouse Ly-6A/E (Sca-1)                           | Pacific Blue™    | Rat                 | D7           | Biolegend   | 108120     |
| mouse CD117 (c-kit) 2B8                         | PE/Cy7           | Rat                 | 2B8          | Biolegend   | 105814     |
| mouse CD45.1                                    | Alexa Fluor® 700 | Mouse               | A20          | Biolegend   | 110724     |
| mouse CD45.1                                    | PE               | Mouse               | A20          | Biolegend   | 110708     |
| mouse CD45.2                                    | FITC             | Mouse               | 104          | Biolegend   | 109806     |
| mouse CD150 (SLAM)                              | APC              | Rat                 | TC15-12F12.2 | Biolegend   | 115910     |
| mouse CD150 (SLAM)                              | Alexa Fluor® 647 | Rat                 | TC15-12F12.2 | Biolegend   | 115918     |
| streptavidin                                    | APC/Cy7          | Rat                 |              | Biolegend   | 405208     |
| mouse CD3e                                      | Alexa Fluor® 647 | Armenian<br>Hamster | 145-2C11     | Biolegend   | 100322     |
| mouse/human CD11b                               | Alexa Fluor® 647 | Rat                 | M1/70        | Biolegend   | 101218     |
| mouse CD34                                      | FITC             | Rat                 | RAM34        | eBioscience | 11-0341-82 |
| mouse Ly-6A/E (Sca-1)                           | PE               | Rat                 | D7           | eBioscience | 12-5981-82 |
| human/mouse<br>HIF-1 alpha<br>phycoerythrin MAb | PE               | Mouse               | 241812       | R&D         | MAB1935    |
| mouse IgG1<br>phycoerythrin isotype<br>control  | PE               | Mouse               | 11711        | R&D         | IC002P     |

**Table S2 Primers used in quantitative real-time PCR assay**

| Gene                           | Forward primer (5'-3')          | Reverse primer (5'-3')       |
|--------------------------------|---------------------------------|------------------------------|
| <i>HIF1<math>\alpha</math></i> | CTGTCTGCCACTTTGAATCAAAGAAATACTG | GGTTGCTGCAATAATGTTCCAATTCCTG |
| <i>HIF1<math>\alpha</math></i> | ACCTTCATCGGAAACTCCAAAG          | CTGTTAGGCTGGGAAAAGTTAGG      |
| <i>P16</i>                     | CTGGGTGCTCTTTGTGTTCC            | TGCTTGAGCTGAAGCTATGC         |
| <i>GAPDH</i>                   | AGAAGACTGTGGATGGCCCCTC          | GATGACCTTGCCCACAGCCTT        |

**Table S3 Primers used for genotyping of *ATF4<sup>fl/fl</sup>*  
and *ATF4<sup>fl/fl</sup>; Scl-Cre-ERT* mice**

| NO. | primer name                            | Sequence                 |
|-----|----------------------------------------|--------------------------|
| 1   | 707389- <i>Atf4</i> -dsDNA-5wt-tF1 (1) | TTGGCCGTATTAGGACGCGA     |
|     | 707389- <i>Atf4</i> -dsDNA-5wt-tR1 (1) | ACAGCAACACTGCTGCTGGA     |
| 2   | 707389- <i>Atf4</i> -ssDNA-D5-5tF1 (3) | GCCTAAGCCATGGCGTGAGT     |
|     | <i>LAR3</i> (3)                        | CACAACGGGTTCTTCTGTTAGTCC |
| 3   | 707389- <i>Atf4</i> -ssDNA-D3-5tF1 (5) | ATGTAGGCAGGAAGCTGGGA     |
|     | common_En2-R (5)                       | CCAACTGACCTTGGGCAAGAACAT |
| 4   | <i>Scl-Cre-F</i>                       | TCGATGCAACGAGTGATGAG     |
|     | <i>Scl-Cre-R</i>                       | TCCATGAGTGAACGAACCTG     |
| 5   | <i>Myo-F</i>                           | TTACGTCCATCGTGGACAGC     |
|     | <i>Myo-R</i>                           | TGGGCTGGGTGTTAGCCTTA     |

**Table S4 List of antibodies and suppliers used in the study**

| Antigen/Specificity         | Host   | Clone    | Source      | Cat. No    | Application |
|-----------------------------|--------|----------|-------------|------------|-------------|
| ATF4                        | Rabbit | EPR18111 | Abcam       | ab184909   | ChIP assay  |
| CDKN2A/p16 <sup>Ink4a</sup> | Rabbit |          | Abcam       | ab189034   | WB          |
| beta-actin                  | Rabbit | AG14521  | Proteintech | 20536-1-AP | WB          |

## Supplementary information

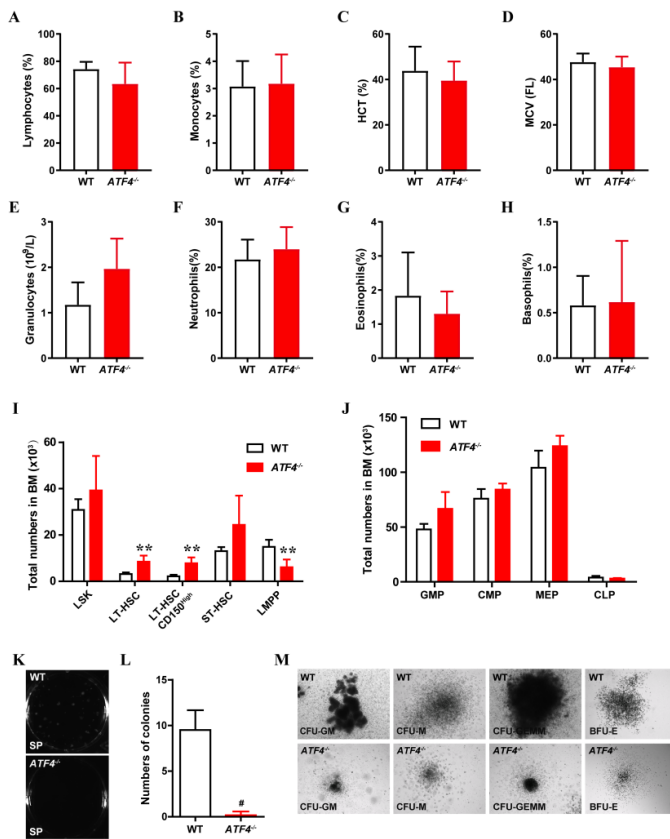

**fig. S1. ATF4 is essential for the homeostasis of HSPCs in adult BM.**

(A-H) Peripheral blood cell counts of WT mice and *ATF4*<sup>-/-</sup> mice (4 months). Peripheral blood collected from the postorbital vein was analyzed using a blood cell counter (n=3-7 per group). HCT: hematocrit; MCV: mean cell volume.

(I, J) The total numbers of LSK cells, LT-HSCs, ST-HSCs, LMPPs and CD150<sup>high</sup>-HSCs (I), and GMPs, CMPs, MEPs and CLPs (J) in BM cells of WT mice and *ATF4*<sup>-/-</sup> mice (2-4 months) (n =3-4 mice per group).

(K-M) In vitro colony-forming unit-spleen (CFU-S) assays.

(K, L) Representative images of total CFU colonies (K) and graph (L) show quantification of changes in the total numbers of CFU colonies derived from spleen cells of *ATF4*<sup>-/-</sup> and WT mice (n=6).

(M) Representative images of hematopoietic progenitor cell colonies from spleen cells of *ATF4*<sup>-/-</sup> and WT mice.

\**P*<0.05, \*\**P*<0.01 and #*P*<0.001 (t test).

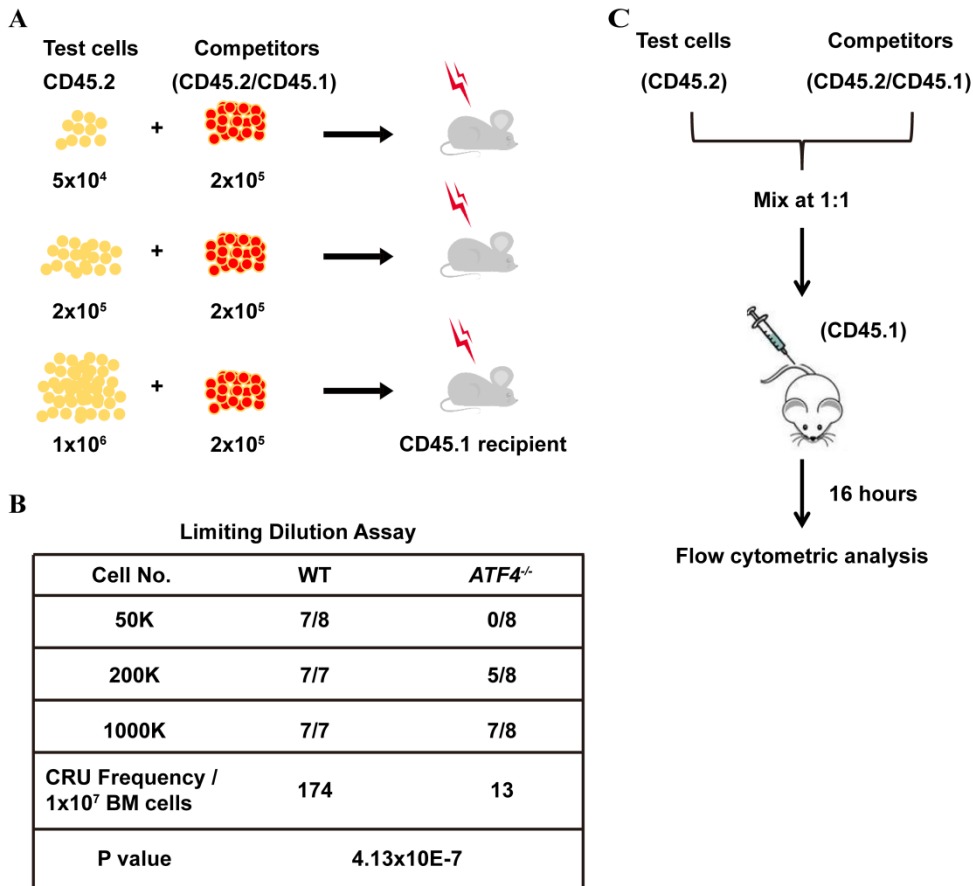

**fig. S2. Deletion of ATF4 impairs the function of HSCs.**

(A) Illustration of limiting dilution assay (LDA) procedure.

(B) Table shows the dose of donor cells and recipient mice for the LDA, and the HSC frequency in BM cells of *ATF4*<sup>-/-</sup> and WT mice (n=7-8 mice per group).

(C) Schematic illustration of homing assay.

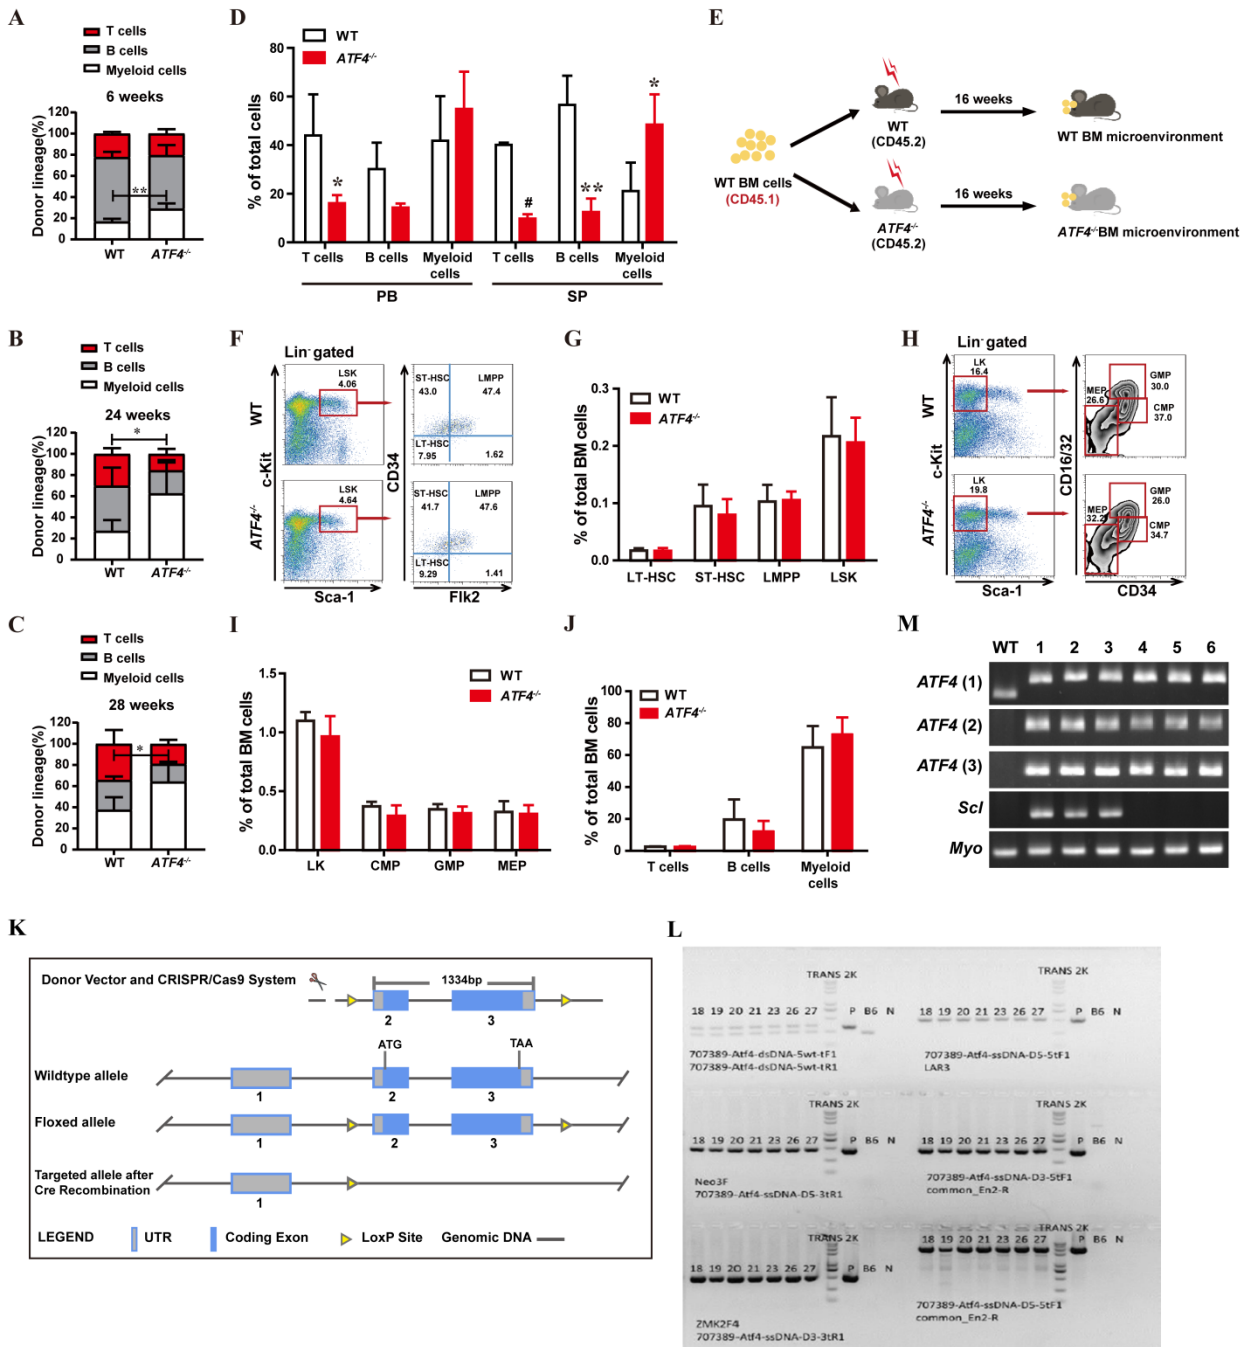

**fig. S3. ATF4 deficiency provokes HSC impairment via cell-intrinsic mechanisms.**

(A-C) Graphs displaying the percentages of donor-derived T, B and myeloid cells in recipient PB at 6, 24 and 28 weeks after BMT (n=2-5 mice per group).

(D) Bar graphs display the percentages of the donor-derived T, B and myeloid cells in PB and spleens of WT recipients (n=2-4 mice per group).

(E) Illustration of reciprocal BMT procedure.

(F, G) Representative FACS plots (F) and histograms (G) showing the frequencies of donor-derived

LSK cells, LT-HSCs, ST-HSCs and LMPPs in total BM cells from WT and *ATF4*<sup>-/-</sup> recipients (n =5-6 mice per group).

**(H, I)** Representative FACS plots **(H)**, and histograms **(I)** showing the frequencies of donor-derived GMPs, CMPs, MEPs and LKs in total BM cells from WT and *ATF4*<sup>-/-</sup> recipients (n=3 mice per group).

**(J)** Frequencies of donor-derived T, B and myeloid cells in total BM cells from WT and *ATF4*<sup>-/-</sup> recipients (n=3 mice per group).

**(K-M)** Establish and identification of *ATF4* conditional knockout (cKO) mice (NBRI).

**(K)** Project description.

1. Transcript *Atf4*-201(ENSMUST00000109605.3) selected for presentation of the recommended strategy.

2. *Atf4*-201 gene has 3 exons, with the ATG start codon in exon 2 and TAA stop codon in exon 3.

3. Construct *Atf4* conditional knockout mice via CRISPR/Cas9 system. Cas9 mRNA, sgRNA and donor will co-injected into zygotes. sgRNA direct Cas9 endonuclease cleavage in intron 1-2 and downstream of exon 3, and create a DSB (double-strand break). Such breaks will be repaired, and result in loxP sites inserted into intron 1-2 and downstream of exon 3 respectively by homologous recombination. When mating with Cre expression allele, sequence between two loxP sites deleted in specific tissues or cells, so *Atf4* gene will disrupted.

4. The pups will be genotyped by PCR, followed by sequence analysis.

5. KO allele obtained after Cre-mediated recombination.

**(L)** Note: B6: negative control of which template is genomic DNA of C57BL/6J mice.

N: blank control without template.

TRANS 2K marker size: 2000bp, 1000bp, 750bp, 500bp, 250bp, 100bp

Analysis and conclusion: F1/wt: 18#-21#, 23#, 26#, 27#.

**(M)** Identification of the F1 generation of *Atf4* cKO mice (NBRI)

\**P*<0.05, \*\**P*<0.01 and #*P*<0.001 (t test).

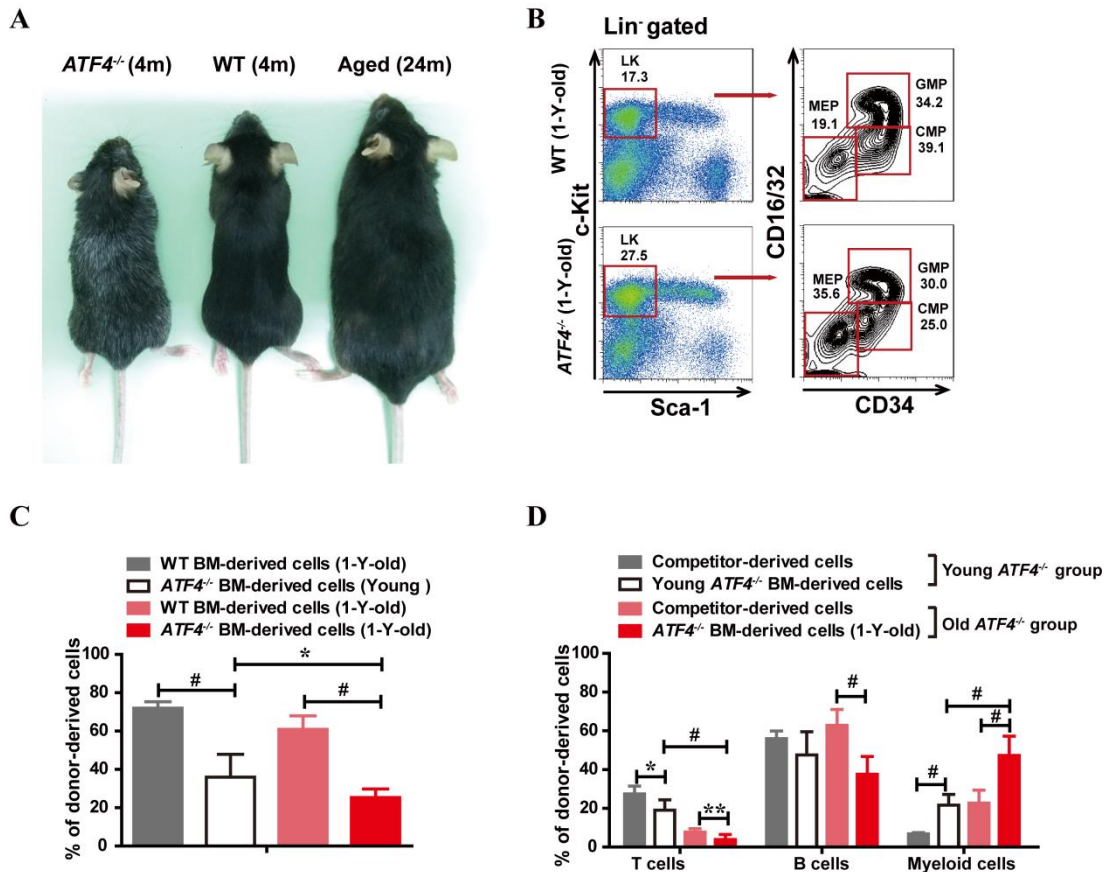

**fig. S4. ATF4 deficiency leads to HSC defects with an aging-like phenotype.**

(A) Representative images of WT mice, ATF4<sup>-/-</sup> mice and aged mice.

(B) Representative FACS plots of GMPs, CMPs and MEPs in BM cells from WT mice (1-year-old) and ATF4<sup>-/-</sup> mice (1-year-old).

(C) Recipient mice were analyzed for the contribution of WT (1-year-old), young ATF4<sup>-/-</sup>(3-months-old) and ATF4<sup>-/-</sup>(1-year-old) donor BM-derived cells in recipient PB at 8 weeks after competitive BMT (n=5-8 mice per group).

(D) The bar graphs display the percentages of ATF4<sup>-/-</sup> (3-months-old), ATF4<sup>-/-</sup> (1-year-old) and their corresponding competitor donor BM-derived T, B and myeloid cells of the recipient mice at 8 weeks after BMT (n=5-8 mice per group). Young ATF4<sup>-/-</sup> group: recipients reconstituted with young ATF4<sup>-/-</sup> BM cells and competitors, Old ATF4<sup>-/-</sup> group: recipients reconstituted with old ATF4<sup>-/-</sup> BM cells (1-year-old) and competitors.

Note: The figures based on Figure 4E, 4O, 4F and 4P, directly comparing young with aged ATF4 KO group.

\*P<0.05, \*\*P<0.01 and #P<0.001 (t test).



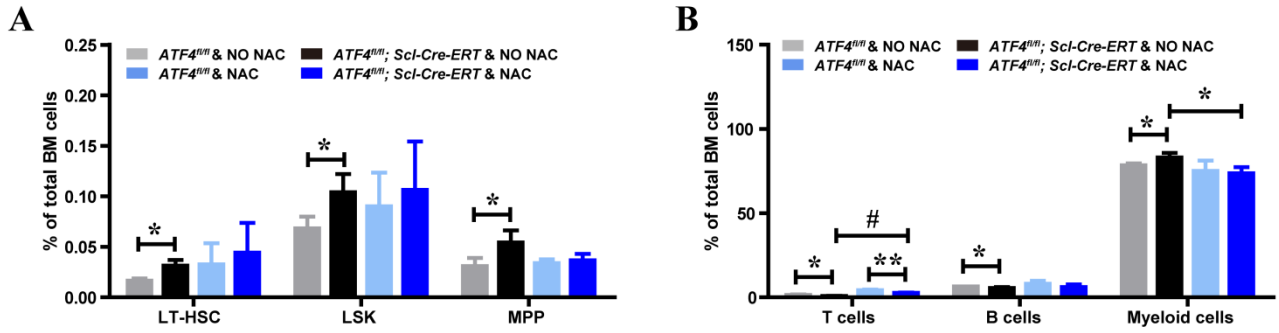

**fig. S5. Mitochondrial ROS contributes to ATF4 deficiency induced HSC defects.**

**(A, B)** The frequency of LT-HSCs, MPP, and LSK cells **(A)** (n=3-4 mice per group), and T, B and myeloid cells **(B)** (n=2-4 mice per group) in BM cells from tamoxifen-induced *ATF4<sup>fl/fl</sup>* and *ATF4<sup>fl/fl</sup>; Scl-Cre-ERT* mice with or without NAC administration.

Note: The figures based on Figure 3H, 3I, 5H and 5I, directly comparing NAC with NO NAC treated group.

\* $P < 0.05$ , \*\* $P < 0.01$  and # $P < 0.001$  (t test).

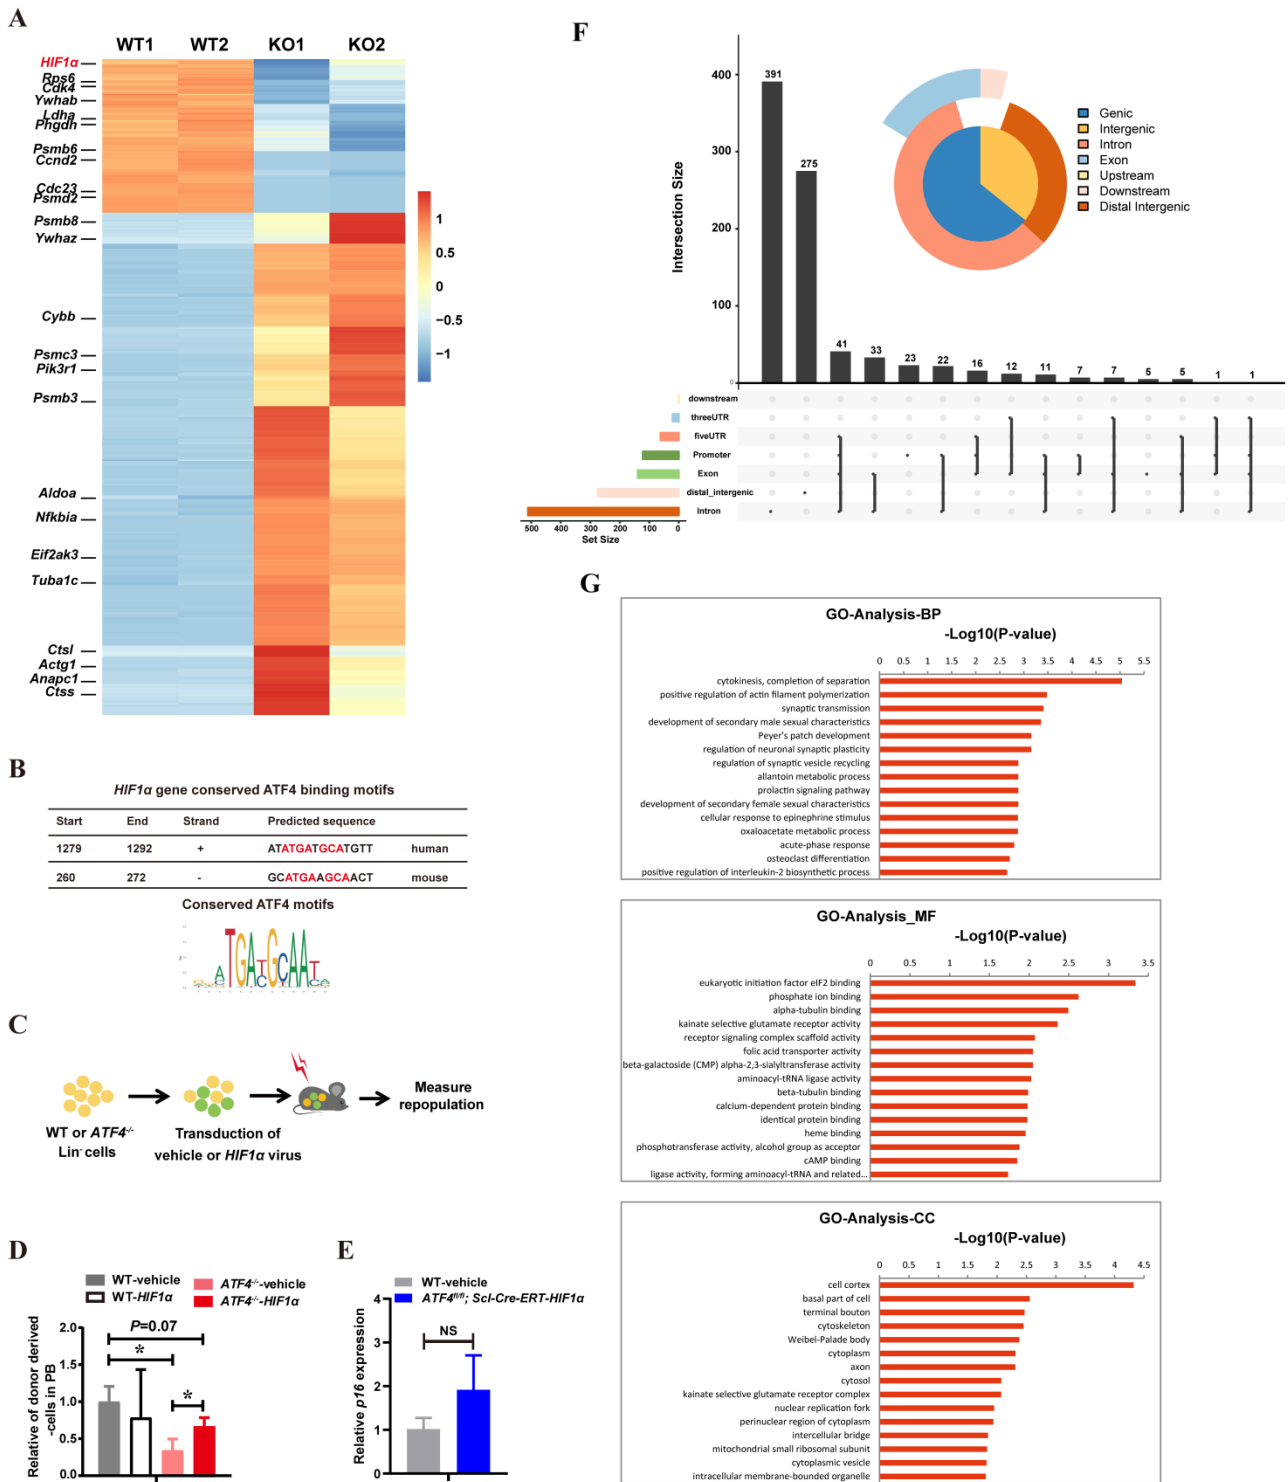

**fig. S6. ATF4 deficiency-induced *HIF1α* downregulation involved in the HSC impairment and AML development..**

(A) Heat map of RNA-seq analysis of differentially expressed genes in WT and *ATF4*<sup>-/-</sup> LT-HSCs.

(B) Identified ATF4 consensus-binding motifs in the promoter of the *HIF1α* gene.

(C) Schematic design of rescuing experiment on *HIF1α* overexpression in WT and *ATF4*<sup>-/-</sup> Lin<sup>-</sup> cells.

**(D)** Repopulation analysis of donor-derived PB chimeras of WT or *ATF4*<sup>-/-</sup> donor cells transduced with recombinant retrovirus carrying *HIF1α* after BMT (n=3 mice per group).

**(E)** mRNA expression of *p16<sup>Ink4a</sup>* in control and *ATF4<sup>fl/fl</sup>; Scl-Cre-ERT* donor-derived BMCs after HIF1α rescue.

**(F, G)** ChIP-seq assay reveal genomic distribution of sequence peaks captured by the antibodies compared with the whole genome of KG1α cells **(F)** and GO enrichment with top-ranked classification ( $P < 0.05$ ) **(G)**.

\* $P < 0.05$ , \*\* $P < 0.01$  and # $P < 0.001$  (t test).
